# Supplementary material
Source: publisher site journal article supplement (https://www.dovepress.com/article/370795)
Supplement: Supplementary file 1 [file get_supplementary_file.php]

**Supplementary file 1(S1): a conceptual framework how different factors are associated with depression among patients under tuberculosis treatment.**

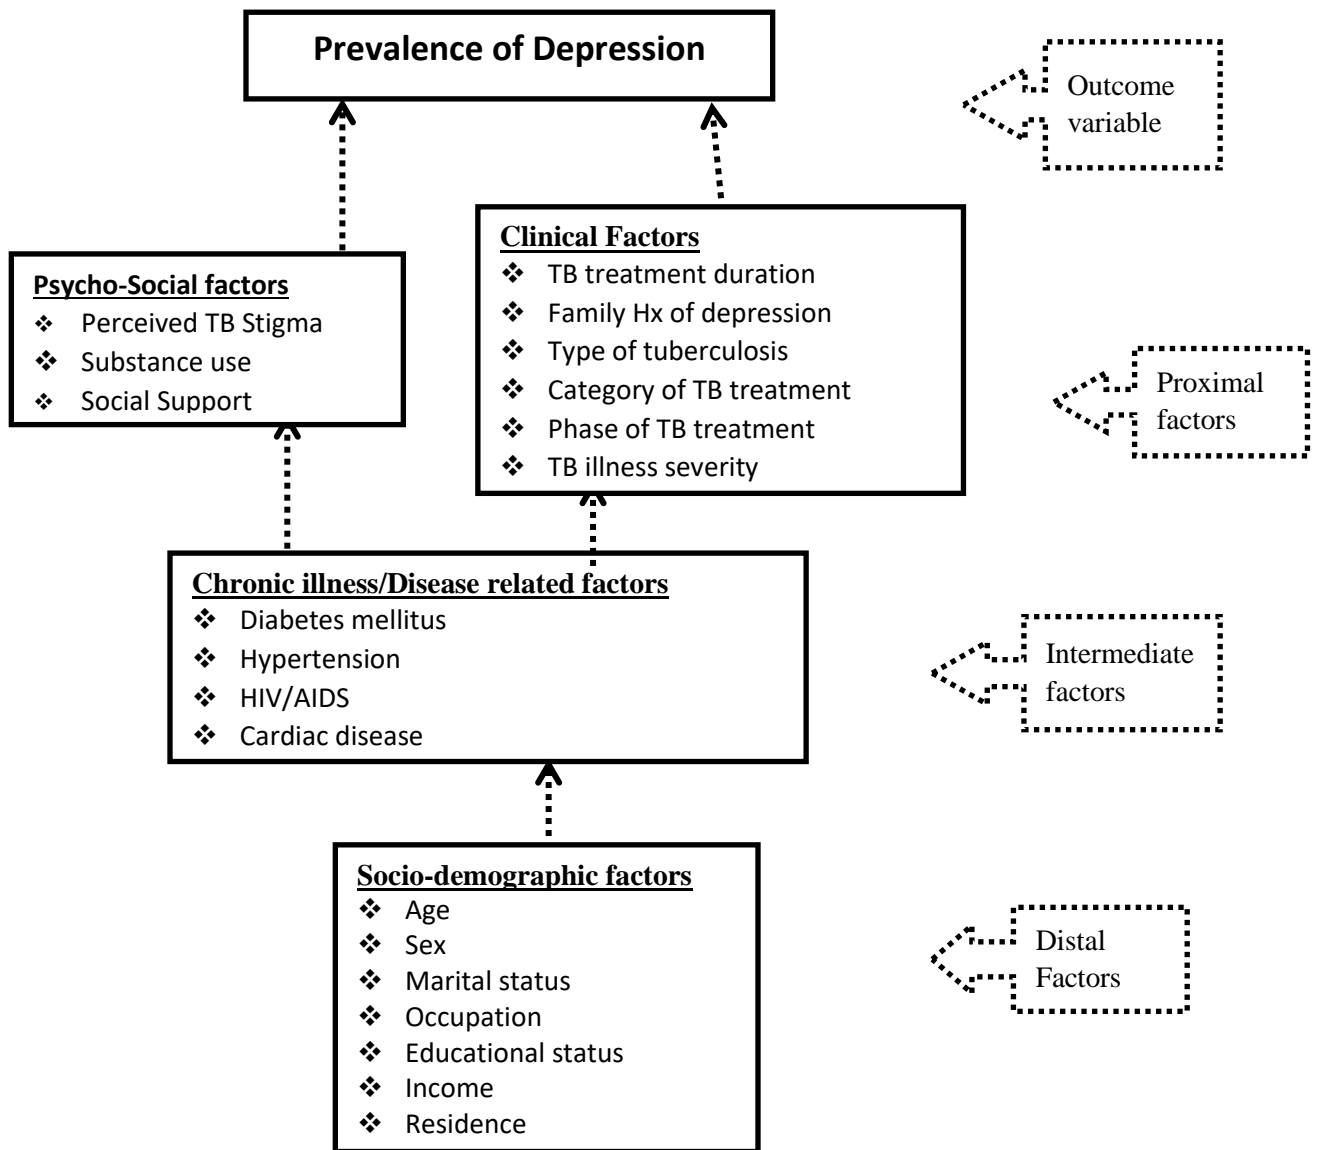

The above conceptual frame work highlights factors associated with depressive illness in patients with tuberculosis.
